# Supplementary material for: Development of validated methods for the simultaneous quantification of Finasteride and Tadalafil in newly launched FDA-approved therapeutic combination: greenness assessment using AGP, analytical eco-scale, and GAPI tools
Source: Royal Society of Chemistry journal article supplement (doi:10.1039/d3ra01437a), 2023-01-01
Supplement: d3ra01437a1.pdf [file d3ra01437a1.pdf]

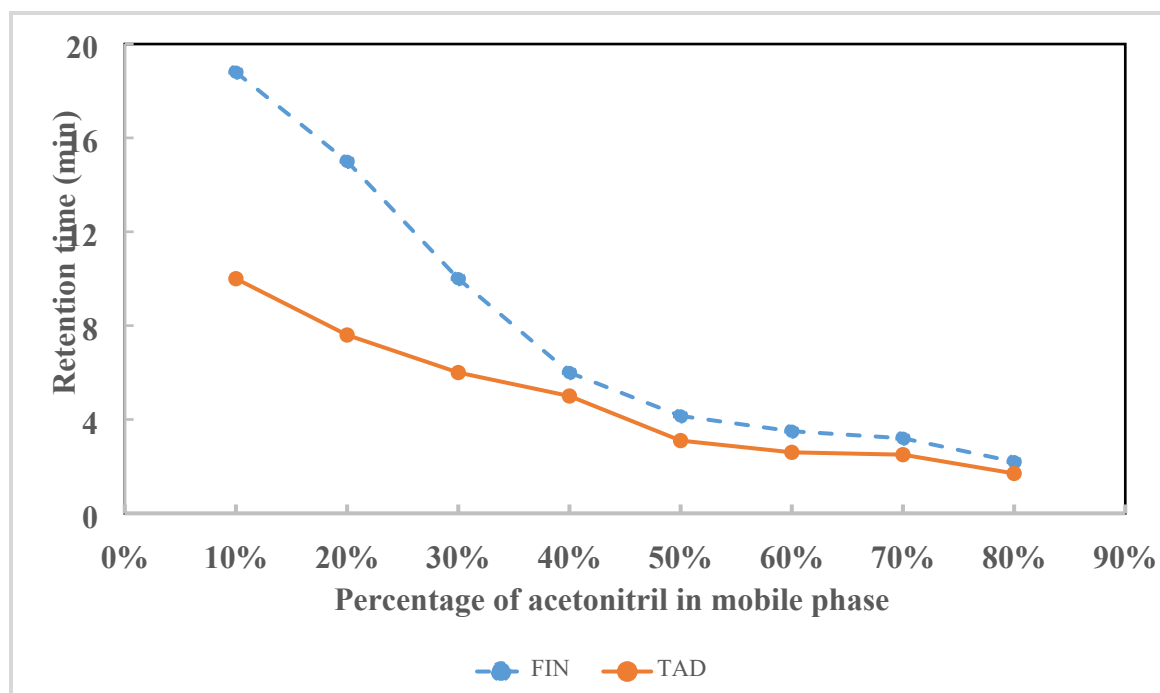

**Fig. S1:** Effect of percentage of acetonitrile in mobile phase on the retention time of FIN and TAD using proposed HPLC method

)

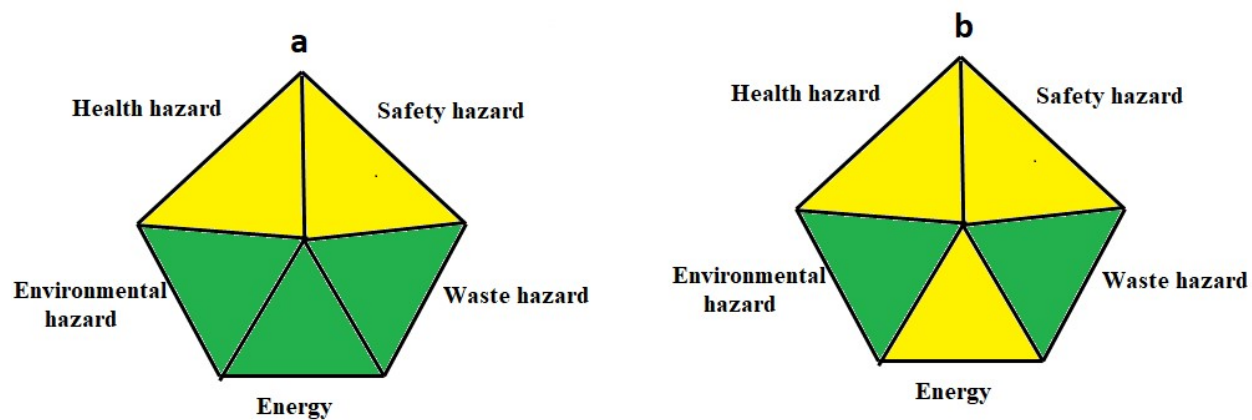

**Fig. S2:** AGP pictogram for assessment of greenness of the spectrophotometric method (a) and HPLC method (b)

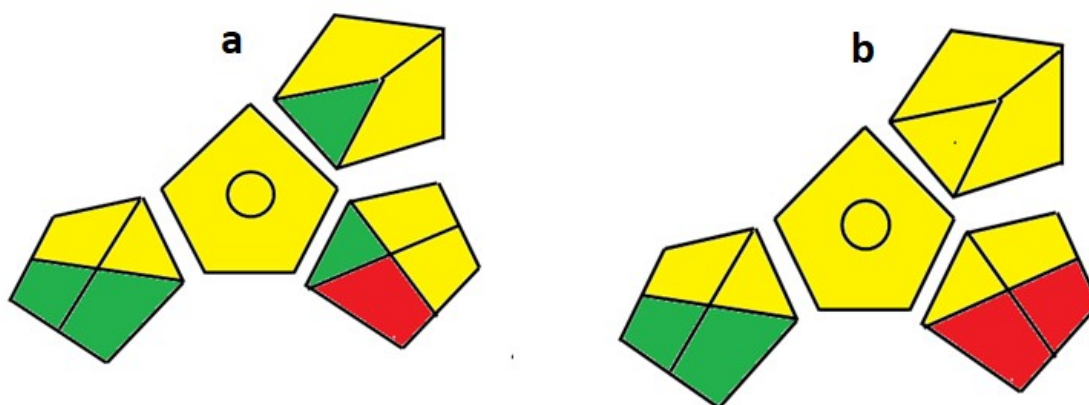

**Fig. S3:** GAPI pictogram for assessment of greenness of the spectrophotometric method (a) and HPLC method (b).

**Table S1**

System suitability parameters of proposed HPLC method for simultaneous determination of FIN and TAD

| Analyte    | Retention time (min) $R_t$ | capacity factor ( $k'$ ) | Selectivity ( $\alpha$ ) | Resolution ( $R_s$ ) | Tailing factor (T) | Number of theoretical plates (N) |
|------------|----------------------------|--------------------------|--------------------------|----------------------|--------------------|----------------------------------|
| <b>TAD</b> | 2.96                       | 1.11                     | 1.62                     | 3.5                  | 1.45               | 2183                             |
| <b>FIN</b> | 3.91                       | 1.79                     |                          |                      | 1.2                | 2877                             |

System suitability recommendations:  $k$  (1-10),  $\alpha > 1$ ,  $R_s > 2$ , T (NMT 2) and N (>2000)

**Table S2**

Ratio of 2D-spectrophotometric peak amplitudes for different concentrations of TAD in bulk powder and in capsules.

| Concentrations in $\mu\text{g/mL}$ | ${}^2D_{291\text{nm}}/{}^2D_{299\text{nm}}$ |                                           |
|------------------------------------|---------------------------------------------|-------------------------------------------|
|                                    | Bulk powder                                 | Capsules*                                 |
| <b>5</b>                           | 2.09                                        | 2.10                                      |
| <b>10</b>                          | 2.09                                        | 2.08                                      |
| <b>15</b>                          | 2.10                                        | 2.09                                      |
| <b>20</b>                          | 2.08                                        | 2.08                                      |
| <b>30</b>                          | 2.08                                        | 2.11                                      |
| <b>40</b>                          | 2.08                                        | 2.09                                      |
| <b>50</b>                          | 2.08                                        | 2.10                                      |
| <b>60</b>                          | 2.09                                        | 2.10                                      |
| <b>Mean</b>                        | <b>2.086</b>                                | <b>2.09</b>                               |
| <b>SD</b>                          | <b><math>7.17 \times 10^{-3}</math></b>     | <b><math>1.0607 \times 10^{-2}</math></b> |
| <b>RSD%</b>                        | <b>0.34</b>                                 | <b>0.51</b>                               |

\*Entafi® capsules (labeled to contain 5 mg FIN and 5 mg TAD per capsule)
